# Supplementary material for: Single-mode lasing and 3D confinement from perovskite micro-cubic cavity
Source: Royal Society of Chemistry journal article supplement (doi:10.1039/c8tc03543a), 2018-01-01
Supplement: c8tc03543a1.pdf [file c8tc03543a1.pdf]

## *Supporting Information*

### *Content*

1. **Fig. S1** Theoretical and experimental relation between thickness of microcavity and Q-factor.
2. **Fig. S2** Diagrammatic drawing of chemical vapour deposition system.
3. **Fig. S3** SEM images of microcavities in three silicon wafers with different positions.
4. **Fig. S4** Structure of 3D simulation and mode field distribution.
5. **Fig. S5** Single-mode lasing obtained from an individual CsPbBr<sub>3</sub> MCC at room temperature through nanosecond laser.
6. **Fig. S6** Multi-mode lasing spectra with higher-order transverse modes.
7. **Table S1.** Comparisons of main laser parameters of reported semiconductor nano/microcavity laser.

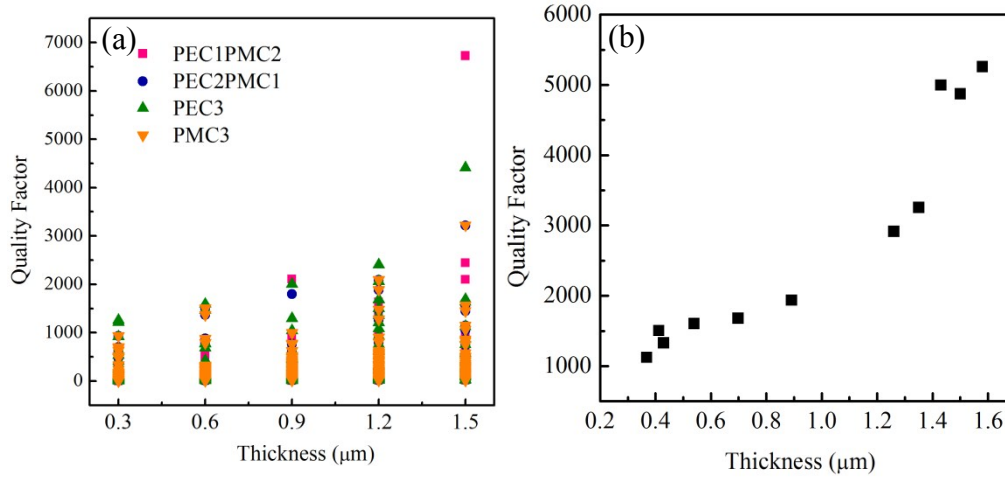

**Fig. S1** (a) The relation between thickness of microcavity and Q-factor is simulated by the three-dimensional finite element method (FEM) (COMSOL Multiphysics 5.0). (b) Experimental relation between thickness of microcavity and Q-factor.

The relation between thickness of microcavity and Q-factor is simulated by the three-dimensional finite element method (FEM) (COMSOL Multiphysics 5.0). Due to the symmetry of the cube, only one-eighth of the cube needs to be simulated by setting four different boundary conditions. The boundary condition of a plane is set as a perfect electrical conductor (PEC) corresponding to a symmetric mode, or a perfect magnetic conductor (PMC) corresponding to an antisymmetric mode. Three symmetric planes are utilized to satisfy the limitation of the computer's RAM. We set the edge length as  $1.5 \mu\text{m}$  and simulate five different thickness of cavity, which shown as Figure S1a. From the theoretical simulation, it can be seen that with increasing the thickness of the cavity, the theoretical Q-factor increases. And, as the thickness of the cavity increases to  $1.5 \mu\text{m}$ , the micro-cubic cavity with three same edges length has the highest Q-factor. Hence, the increase of Q-factor is due to the increase of thickness of the microcavities can be theoretically proved. In the experiment, we also measured the Q-factor of microcavities which have nearly same edge length of  $1.5 \mu\text{m}$  but different thickness. The result shown in Figure S1b manifests that the Q-factor increases with the increasing of thickness, which is in agreement with the theoretical result.

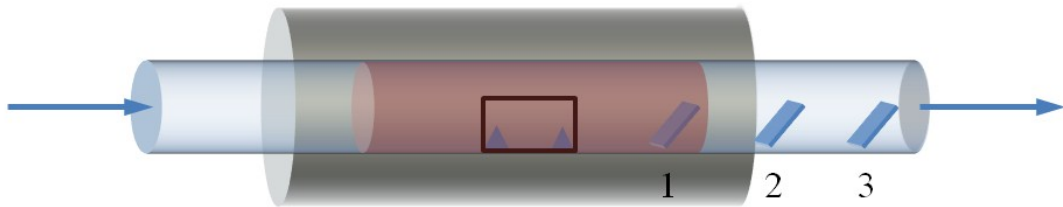

**Fig. S2** Diagrammatic drawing of one-step dual-source chemical vapor deposition system. Three silicon wafers (1, 2, 3) are placed in the outlet at different positions.

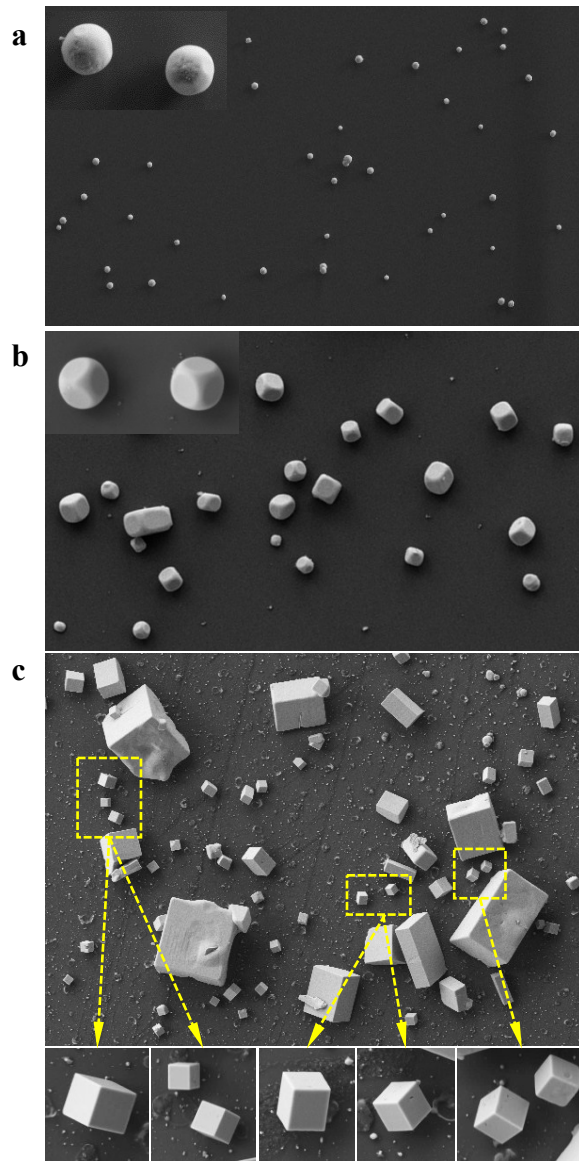

**Fig. S3** SEM images of microcavities in (a) Si wafer 3, (b) Si wafer 2, (c) Si wafer 1.

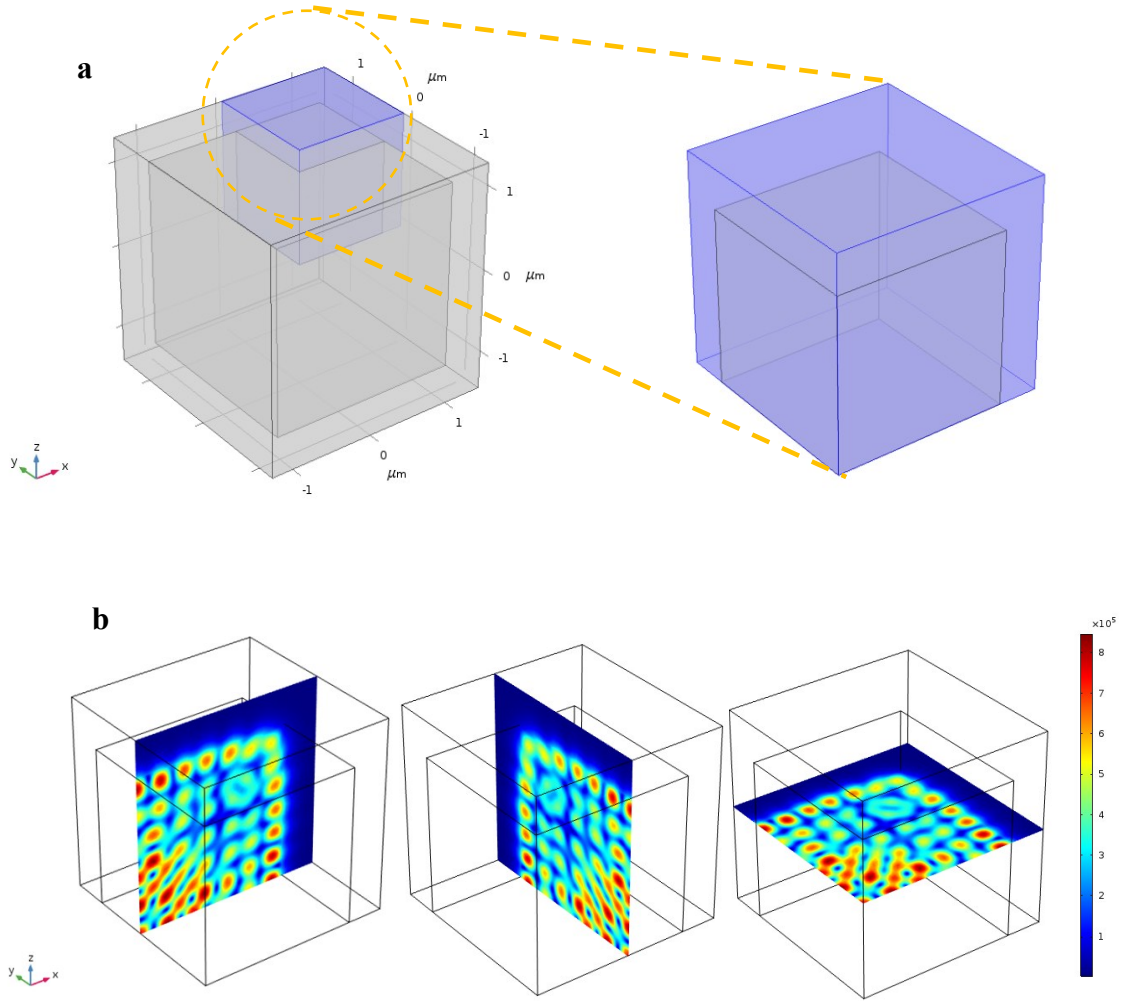

**Fig. S4** (a) Structure of 3D simulation. (b) Mode field distribution of the high Q mode on three different planes, x-y plane, y-z plane and x-z plane.

As shown in Fig. S4a, we set the microresonator to have a side length of 2.2  $\mu\text{m}$  and a vacuum layer thickness of 0.25  $\mu\text{m}$ . Since the cube is completely symmetric about the three faces that pass its center (e.g. x-y, y-z, x-z), we can reduce the amount of calculation by setting the appropriate boundary conditions. At the same time, each symmetry plane has two boundary settings, namely a perfect electrical conductor (PEC, corresponding to a symmetric mode) and a perfect magnetic conductor (PMC, corresponding to an antisymmetric mode). Therefore, there are four different combinations to completely simulate the mode of a cubic microresonator. Therefore, there are four different combinations to completely simulate the mode of a cubic micro-resonator where all three symmetry planes are perfect electrical conductors

(PEC3), the two symmetry planes are perfect electrical conductors and one symmetry plane is a perfect magnetic conductor (PEC2-PMC1), one symmetry plane is a perfect electrical conductor and two symmetry planes are perfect magnetic conductors (PEC1-PMC2), and all three symmetry planes are perfect magnetic conductors (PMC3). Fig. S4b shows the mode field distribution of the high Q mode on three planes. All three symmetry planes are set to perfect electrical conductors, so the mode field distribution  $|H|^2$  of the three planes is exactly the same.

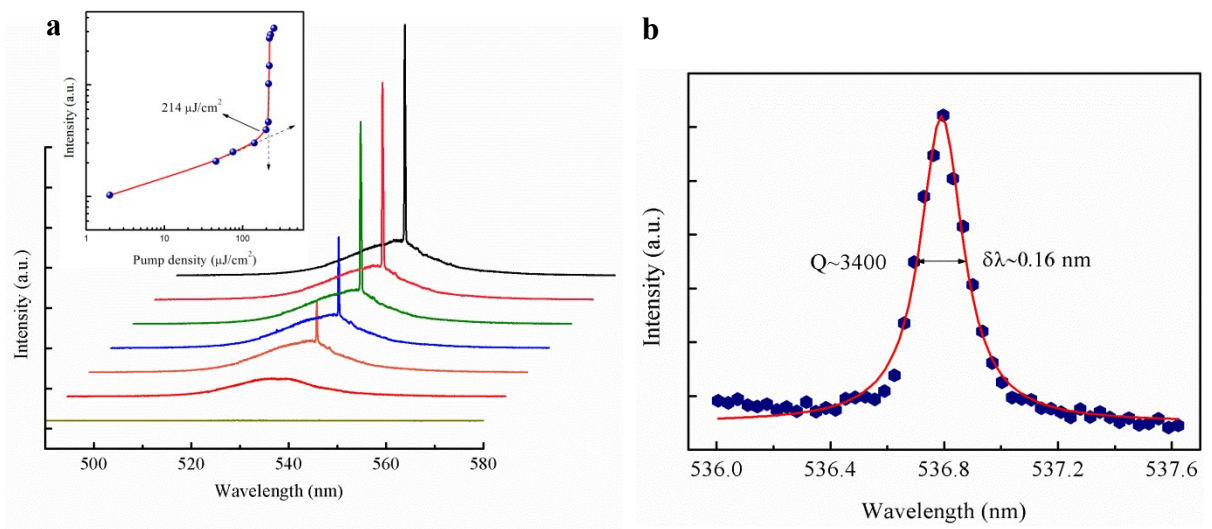

**Fig. S5** Single-mode lasing obtained from an individual CsPbBr<sub>3</sub> MCC at room temperature through 355 nm nanosecond laser (1.1 ns, 20 KHz). (a) Excitation power-dependent lasing spectra from one single CsPbBr<sub>3</sub> MCC. (b) Lorentz fitting of a lasing oscillation mode, giving the FWHM of the lasing peak ( $\delta\lambda$ )  $\sim 0.16 \text{ nm}$ .

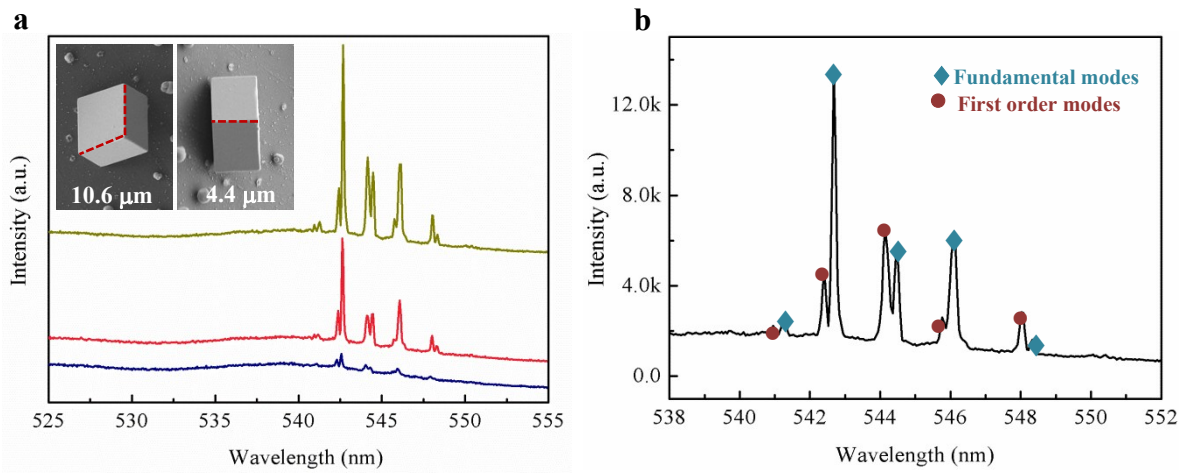

**Fig. S6** Multi-mode lasing spectra with sub-modes. (a) Lasing obtained from large CsPbBr<sub>3</sub> MCC. Insets: SEM images of large CsPbBr<sub>3</sub> MCC with three sides' length of 10.6 μm, 10.6 μm and 7.4 μm. (b) Enlarged lasing spectra.



| Material                             | Lasing peak<br>(nm) | Lasing linewidth<br>(nm) | Q-factor | Threshold at RT<br>( $\mu\text{J}/\text{cm}^2$ ) | Pumping<br>Source |
|--------------------------------------|---------------------|--------------------------|----------|--------------------------------------------------|-------------------|
| [1] ZnSe Nanowire                    | 461                 | 0.72                     | 640      | $\sim 340$                                       | 150 fs, 1 kHz     |
| [2] CdS Nanowire                     | 512                 | 0.40                     | 1280     | $\sim 14$                                        | 120 fs, 1 kHz     |
| [3] ZnO Nanowire                     | 387                 | 0.80                     | 484      | $\sim 400$                                       | 8 ns, 10 Hz       |
| [4] ZnO Nanodisk                     | 389                 | 0.70                     | 556      | $\sim 750$                                       | 8 ns, 10 Hz       |
| [5] CsPbCl <sub>3</sub> Nanowires    | 420                 | 0.30                     | 1400     | $\sim 7.0$                                       | 150 fs, 100 kHz   |
| [6] CsPbBr <sub>3</sub> Nanowires    | 538                 | 0.26                     | 2069     | $\sim 6.2$                                       | 100 fs, 250 kHz   |
| [7] CsPbBr <sub>3</sub> Nanoplatelet | 535                 | 0.15                     | 3500     | $\sim 2.0$                                       | 50 fs, 1 KHz      |
| [8] CsPbBr <sub>3</sub> Microsphere  | 545                 | 0.09                     | 6100     | $\sim 0.42$                                      | 40 fs, 10 KHz     |
| [9] CsPbBr <sub>3</sub> Nanocuboid   | 539                 | 0.29                     | 1850     | $\sim 40.2$                                      | 35 fs, 1 KHz      |
| [♦] CsPbBr <sub>3</sub> MCC          | 541                 | 0.064                    | 8500     | $\sim 16.9$                                      | 40 fs, 10 KHz     |
| [♦] CsPbBr <sub>3</sub> MCC          | 537                 | 0.16                     | 3400     | $\sim 214$                                       | 1.1 ns, 20 KHz    |

**Table S1.** Comparisons of main laser parameters of reported semiconductor nano/microcavity laser. [♦] represents the work of this paper.

## References

- [1] Xing. G, Luo. J, Li. H, Wu. B, Liu. X, Huan. A, Fan. H, T. C. Sum, *Adv. Opt. Mater.* 2013, **1**, 319–326.
- [2] Pan. A, Liu. R, Yang. Q, Zhu. Y, Yang. G, Zou. B, Chen. K, *J. Phys. Chem. B.* 2005, **109**, 24268–24272.
- [3] Gargas. D. J, Toimilmola. M. E, Yang. P, *J. Am. Chem. Soc.* 2009, **131**, 2125–2127.
- [4] Gargas. D. J, Moore. M. C, Ni. A, Chang. S. W, Zhang. Z, Chuang. S. L, Yang. P, *ACS Nano*, 2010, **4**, 3270–3276.
- [5] Park. K, Lee. J. W, Kim. J. D, Han. N. S, Jang. D. M, Jeong. S, Park. J, Song. J. K. *J. Phys. Chem. Lett.* 2016, **7**, 3703–3710.
- [6] Fu. Y, Zhu. H, Stoumpos. C. C, Ding. Q, Wang. J, Kanatzidis. M. G, Zhu. X, Jin. S, *ACS Nano*, 2016, **10**, 7963–7972.
- [7] Q. Zhang, R. Su, X. Liu, J. Xing, T. C. Sum, Q. Xiong, *Adv. Funct. Mater.* 2016, **26**, 6238-6245.
- [8] B. Tang, H. Dong, L. Sun, W. Zheng, Q. Wang, F. Sun, X. Jiang, A. Pan. L. Zhang, *ACS Nano*, 2017, **11**, 10681-10688.
- [9] Z. Liu, J. Yang, J. Du, Z. Hu, T. Shi, Z. Zhang, Y. Liu, X. Tang, Y. Leng, R. Li, *ACS Nano*. 2018
